# Supplementary material for: Bioactive components and mechanisms of Pu-erh tea in improving levodopa metabolism in rats through COMT inhibition
Source: Royal Society of Chemistry journal article supplement (doi:10.1039/d4fo00538d), 2024-01-01
Supplement: d4fo00538d1.pdf [file d4fo00538d1.pdf]

1 **Supplementary information**

2 **of**

3 **Bioactive components and mechanisms of Pu-erh tea in improving**  
4 **levodopa metabolism in rats through COMT inhibition**

5  
6 Ziqiong Zhou<sup>a,1</sup>, Yan Li<sup>b,1</sup>, Fangyuan Wang<sup>a,d</sup>, Guanghao Zhu<sup>a</sup>, Shenglan Qi<sup>a,d</sup>, Haonan Wang<sup>e</sup>, Yuhe  
7 Ma<sup>c</sup>, Rong Zhu<sup>a</sup>, Yuejuan Zheng<sup>c,\*</sup>, Guangbo Ge<sup>a,\*</sup>, Ping Wang<sup>a,\*</sup>

8  
9 <sup>a</sup>Shanghai Frontiers Science Center of TCM Chemical Biology, Institute of Interdisciplinary  
10 Integrative Medicine Research, Shanghai University of Traditional Chinese Medicine, Shanghai  
11 201203, China

12 <sup>b</sup>School of Public Health, Shanghai Jiao Tong University School of Medicine, Shanghai, 200025,  
13 China

14 <sup>c</sup>The Research Center for Traditional Chinese Medicine, Shanghai Institute of Infectious Diseases and  
15 Biosecurity, Shanghai University of Traditional Chinese Medicine, Shanghai, 201203, China

16 <sup>d</sup>Key Laboratory of Liver and Kidney Diseases (Ministry of Education), Institute of Liver Diseases,  
17 Shuguang Hospital Affiliated to Shanghai University of Traditional Chinese Medicine, Shanghai  
18 201203, China

19 <sup>e</sup>*Shanghai Inoherb Cosmetics Co. Ltd., Technology Center, 121 Chengyin Road, Baoshan District,*  
20 *Shanghai, Shanghai, CN 200083*

21  
22 \*Corresponding author

23 E-mail address: pwang@shutcm.edu.cn (P. Wang); geguangbo@shutcm.edu.cn (G.-B. Ge);  
24 zhengyj@shutcm.edu.cn (Y.-J. Zheng)

25 <sup>1</sup>These authors contributed equally to this work.

29 ***1.1 UHPLC-Q-Exactive Orbitrap HRMS analysis***

30 The chromatographic analysis of the Pu-erh extract was performed on an Acquity UPLC BEH C18  
31 column (100 mm × 2.1 mm, 1.7 μm). The mobile phases consisted of an aqueous solution containing  
32 0.1% (v/v) formic acid (A) and methanol (B) with the following linear gradient: 4% B from 0 to 4  
33 minutes, 4% to 12% B from 4 to 10 minutes, 12% to 70% B from 10 to 30 minutes, 70% B at 30 to 35  
34 minutes, 70% to 95% B from 35 to 38 minutes, 95% B from 38 to 42 minutes, and 4% B from 42 to  
35 45 minutes. The column temperature was maintained at 40 °C. A 5 μL aliquot of each sample was  
36 injected into the system, and the flow rate was set at 0.3 mL/min. For mass spectrometry analysis, a Q  
37 Ex active Mass Spectrometer was used in both positive and negative ion modes, scanning over a mass  
38 range of m/z 80 to 1200 at a resolution of 70,000 full width at half maximum (FWHM) for MS1  
39 acquisition and 17,500 FWHM for MS/MS acquisition.

40 **Table S1** Anti-COMT effects of 94 Chinese medicine extracts (residual enzyme activity was used as visualization data, three parallel averages).

| NO. | Chinese medicine extracts                               | Residual activity (%) | NO. | Chinese medicine granules                               | Residual activity (%) |
|-----|---------------------------------------------------------|-----------------------|-----|---------------------------------------------------------|-----------------------|
| A3  | <i>Pu-erh tea (Leaf)</i>                                | 3.58                  | C3  | <i>Teasel root</i>                                      | 59.29                 |
| A4  | <i>Creeping euphorbia (Herb)</i>                        | 15.91                 | C4  | <i>Llex cornuta Lindl.ex Paxt (Leaf)</i>                | 61.31                 |
| A5  | <i>Carbonized sanguisorba root (Root)</i>               | 19.60                 | C5  | <i>Radix ilicis pubesceatis (Root)</i>                  | 61.52                 |
| A6  | <i>Poria with hostwood (Sclerotinite)</i>               | 23.79                 | C6  | <i>Cordate houttuynia (Leaf)</i>                        | 61.59                 |
| A7  | <i>Pinellia ternata (Tuber)</i>                         | 27.58                 | C7  | <i>Jiang Zhuru (The dry middle layer of the stem)</i>   | 62.65                 |
| A8  | <i>Traditional Chinese Medicine Lulutong (Fruit)</i>    | 34.94                 | C8  | <i>Prepared licorice (Rhizome)</i>                      | 62.91                 |
| A9  | <i>Cyrtomium fortunei (Rhizome)</i>                     | 35.16                 | C9  | <i>Paris polyphylla (Rhizome)</i>                       | 63.07                 |
| A10 | <i>Tripterygium wilfordii (Root)</i>                    | 37.49                 | C10 | <i>Epimedium (Leaf)</i>                                 | 63.97                 |
| A11 | <i>Cynanchum atratum bge (Rhizome)</i>                  | 39.2                  | C11 | <i>Anemarrhena asphodeloides (Rhizome)</i>              | 65.62                 |
| A12 | <i>Folium artemisiae argyi (Leaf)</i>                   | 39.59                 | C12 | <i>Fructus kochiae (Fruit)</i>                          | 66.97                 |
| B1  | <i>Piper longum L (Cluster)</i>                         | 39.68                 | D1  | <i>Preparation of aconitum multiflorum (Root block)</i> | 67.32                 |
| B2  | <i>Sappanwood (Dry heart)</i>                           | 42.76                 | D2  | <i>Acorus graminens soland (Rhizome)</i>                | 68.12                 |
| B3  | <i>Convolvulus flower (Capitulum)</i>                   | 45.36                 | D3  | <i>Radix rhapontici (Root)</i>                          | 69.66                 |
| B4  | <i>Pyrola (Herb)</i>                                    | 47.07                 | D4  | <i>Salted orange peel (Peel of fruit)</i>               | 69.78                 |
| B5  | <i>Giant typhonium rhizome (Tuber)</i>                  | 47.75                 | D5  | <i>Asparagus fern (Earthnut)</i>                        | 70.21                 |
| B6  | <i>Glutinous rice root (Rhizomes and fibrous roots)</i> | 48.11                 | D6  | <i>Fried fructus viticis (Fruit)</i>                    | 71.32                 |
| B7  | <i>Barley (Fruit)</i>                                   | 49.23                 | D7  | <i>Asiatic dayflower (Leaf)</i>                         | 71.36                 |
| B8  | <i>Rhizoma drynariae (Rhizome)</i>                      | 51.05                 | D8  | <i>Acanthopanax senticosus (Rhizome)</i>                | 71.57                 |
| B9  | <i>Fried sophora japonica (Flower)</i>                  | 51.46                 | D9  | <i>Notopterygium root (Root)</i>                        | 71.73                 |
| B10 | <i>Amomum costalum Roxb (Seed)</i>                      | 56.9                  | D10 | <i>Black bean clothing (Seed coat)</i>                  | 71.8                  |
| B11 | <i>Chrysanthemum (Flower heads)</i>                     | 57.06                 | D11 | <i>Lindera root (Root)</i>                              | 72.49                 |
| B12 | <i>Amomum tsao-ko (Fruit)</i>                           | 57.13                 | D12 | <i>Umbellate pore fungus (Fungus)</i>                   | 73.69                 |
| C1  | <i>Huai wheat (Fruit)</i>                               | 58.78                 | E1  | <i>Puffball (Fungus)</i>                                | 73.74                 |
| C2  | <i>American ginseng (Root)</i>                          | 58.93                 | E2  | <i>Angelica dahurica (Root)</i>                         | 74.44                 |
| E3  | <i>Phellodendron amurense (Bark)</i>                    | 74.88                 | G2  | <i>Flos magnoliae officinalis (Flower)</i>              | 82.17                 |
| E4  | <i>Stachyurus pith (Leaf)</i>                           | 74.84                 | G3  | <i>Solomon's seal (Rhizome)</i>                         | 82.48                 |

|     |                                                        |       |     |                                                         |       |
|-----|--------------------------------------------------------|-------|-----|---------------------------------------------------------|-------|
| E5  | <i>Pericarpium citri reticulatae (Pericarp)</i>        | 75.91 | G4  | <i>Bryozoatum</i>                                       | 83.08 |
| E6  | <i>Gypsum (Mineral)</i>                                | 75.91 | G5  | <i>Cistanche deserticola (Succulent stem)</i>           | 84.12 |
| E7  | <i>Salt fennel (Fruit)</i>                             | 76.54 | G6  | <i>Equisetum</i>                                        | 84.66 |
| E8  | <i>Asiatic Plantain (Leaf and seed)</i>                | 76.76 | G7  | <i>Malva verticillata L (Fruit)</i>                     | 85.68 |
| E9  | <i>Lygodium japonicum (Leaf)</i>                       | 76.83 | G8  | <i>Lotus seed (Mature seed)</i>                         | 85.93 |
| E10 | <i>Andrographis paniculata</i>                         | 76.89 | G9  | <i>Aesculus chinensis Bunge (Seed)</i>                  | 85.83 |
| E11 | <i>Clam shell</i>                                      | 76.96 | G10 | <i>Ophicalcite (Metamorphic rock)</i>                   | 86.06 |
| E12 | <i>Gorgon fruit (Fruit)</i>                            | 77.1  | G11 | <i>Bog rush (Stem pulp)</i>                             | 86.59 |
| F1  | <i>Akebia (Rattan)</i>                                 | 77.19 | G12 | <i>Hyacinth bean flower (Flower)</i>                    | 86.61 |
| F2  | <i>Radix isatidis (Root)</i>                           | 77.75 | H1  | <i>Kelp (Dry foliate)</i>                               | 86.76 |
| F3  | <i>Tangerine (Epicarp)</i>                             | 78.06 | H2  | <i>Vinegar faeces trogopteroi (feces)</i>               | 87.15 |
| F4  | <i>Dried ginger (Rhizome)</i>                          | 78.77 | H3  | <i>Fritillaria thunbergii (Bulb)</i>                    | 88.37 |
| F5  | <i>Platycodon grandiflorum (Root)</i>                  | 79.37 | H4  | <i>Appendage (Earthnut)</i>                             | 88.45 |
| F6  | <i>Vinegar curcuma zedoary (Rhizome)</i>               | 79.02 | H5  | <i>Astragalus membranaceus (Root)</i>                   | 88.9  |
| F7  | <i>Cuttlebone (Inner shell)</i>                        | 79.3  | H6  | <i>Tabasheer (Rod secretion)</i>                        | 89.08 |
| F8  | <i>Vinegar cyperus rotundus (Rhizome)</i>              | 79.82 | H7  | <i>Citri Sarcodactylis Fructus (Seed)</i>               | 90.83 |
| F9  | <i>Stir fried spring sprouts (Bud)</i>                 | 79.93 | H8  | <i>Calcined ochre (Mineral)</i>                         | 91.23 |
| F10 | <i>Evodia rutaecarpa (Tender fruit)</i>                | 79.97 | H9  | <i>Dendrobe (Stem)</i>                                  | 92.25 |
| F11 | <i>Pericarpium trichosanthis (Pericarp)</i>            | 80.44 | H10 | <i>Peach kernel (Fruit)</i>                             | 93.11 |
| F12 | <i>Ginkgo (Fruit)</i>                                  | 81.05 | H11 | <i>Luffae fructus (Vascular bundle of mature fruit)</i> | 93.64 |
| G1  | <i>Ginger-processed officinal magnolia bark (Bark)</i> | 81.34 | H12 | <i>Trigonella foenum-graecum L (Seed)</i>               | 99.25 |

41  
42  
43  
44  
45  
46  
47

48

**Table S2** AUC of L-DOPA and 3-OMD.

| <b>Groups</b>                  | <b>L-DOPA</b><br>AUC <sub>0-120 minutes</sub> | <b>3-OMD</b><br>AUC <sub>0-120 minutes</sub> |
|--------------------------------|-----------------------------------------------|----------------------------------------------|
| L-DOPA                         | 21689 ± 5421                                  | 33984 ± 11365                                |
| L-DOPA +Carbidopa              | 97825 ± 21084                                 | 254231 ± 54997                               |
| Pu-erh tea + L-DOPA +Carbidopa | 139814 ± 17980                                | 116099 ± 25732                               |

All data are shown as mean ± SD (n=7).

49

50

**Table S3** Identification of chemical constituents in Pu-erh tea extract by UHPLC-Q-Exactive Orbitrap HRMS.

| No. | RT (min) | Ion mode           | Measured mass/Da | Calculated mass/Da | Error/ppm | Molecular formula                                            | Identification                     | Classes      |
|-----|----------|--------------------|------------------|--------------------|-----------|--------------------------------------------------------------|------------------------------------|--------------|
| 1*  | 0.90     | [M-H] <sup>-</sup> | 191.05544        | 191.05501          | 2.228     | C <sub>7</sub> H <sub>12</sub> O <sub>6</sub>                | Quinic acid                        | Organic acid |
| 2   | 1.24     | [M-H] <sup>-</sup> | 173.09224        | 173.09207          | 0.990     | C <sub>7</sub> H <sub>14</sub> N <sub>2</sub> O <sub>3</sub> | Theanine                           | Amino acid   |
| 3*  | 2.00     | [M-H] <sup>-</sup> | 169.01326        | 169.01315          | 0.653     | C <sub>7</sub> H <sub>6</sub> O <sub>5</sub>                 | Gallic acid                        | Organic acid |
| 4   | 2.28     | [M-H] <sup>-</sup> | 343.06726        | 343.06597          | 3.752     | C <sub>14</sub> H <sub>16</sub> O <sub>10</sub>              | Theogallin                         | Organic acid |
| 5*  | 3.75     | [M-H] <sup>-</sup> | 305.06696        | 305.06558          | 4.527     | C <sub>15</sub> H <sub>14</sub> O <sub>7</sub>               | Gallocatechin                      | Flavonoid    |
| 6*  | 5.58     | [M+H] <sup>+</sup> | 181.07188        | 181.07200          | -0.675    | C <sub>7</sub> H <sub>8</sub> N <sub>4</sub> O <sub>2</sub>  | Theobromine                        | Alkaloid     |
| 7*  | 6.35     | [M-H] <sup>-</sup> | 353.08823        | 353.08671          | 4.310     | C <sub>16</sub> H <sub>18</sub> O <sub>9</sub>               | Neochlorogenic acid                | Organic acid |
| 8*  | 8.15     | [M-H] <sup>-</sup> | 305.06689        | 305.06558          | 4.298     | C <sub>15</sub> H <sub>14</sub> O <sub>7</sub>               | Epigallocatechin                   | Flavonoid    |
| 9*  | 8.36     | [M-H] <sup>-</sup> | 289.07196        | 289.07066          | 4.482     | C <sub>15</sub> H <sub>14</sub> O <sub>6</sub>               | Catechin                           | Flavonoid    |
| 10* | 9.55     | [M-H] <sup>-</sup> | 353.08817        | 353.08671          | 4.140     | C <sub>16</sub> H <sub>18</sub> O <sub>9</sub>               | Chlorogenic acid                   | Organic acid |
| 11* | 10.52    | [M-H] <sup>-</sup> | 353.08817        | 353.08671          | 4.140     | C <sub>16</sub> H <sub>18</sub> O <sub>9</sub>               | Cryptochlorogenic acid             | Organic acid |
| 12* | 10.53    | [M+H] <sup>+</sup> | 195.08763        | 195.08765          | -0.113    | C <sub>8</sub> H <sub>10</sub> N <sub>4</sub> O <sub>2</sub> | Caffeine                           | Alkaloid     |
| 13* | 11.05    | [M-H] <sup>-</sup> | 457.07813        | 457.07654          | 3.484     | C <sub>22</sub> H <sub>18</sub> O <sub>11</sub>              | Gallocatechin gallate              | Flavonoid    |
| 14* | 11.87    | [M-H] <sup>-</sup> | 289.07199        | 289.07066          | 4.586     | C <sub>15</sub> H <sub>14</sub> O <sub>6</sub>               | Epicatechin                        | Flavonoid    |
| 15* | 12.66    | [M-H] <sup>-</sup> | 457.07800        | 457.07654          | 3.200     | C <sub>22</sub> H <sub>18</sub> O <sub>11</sub>              | Epigallocatechin gallate           | Flavonoid    |
| 16* | 14.88    | [M-H] <sup>-</sup> | 441.08295        | 441.08162          | 3.009     | C <sub>22</sub> H <sub>18</sub> O <sub>10</sub>              | Catechin gallate                   | Flavonoid    |
| 17* | 15.93    | [M-H] <sup>-</sup> | 441.08307        | 441.08162          | 3.281     | C <sub>22</sub> H <sub>18</sub> O <sub>10</sub>              | Epicatechin gallate                | Flavonoid    |
| 18* | 18.34    | [M-H] <sup>-</sup> | 300.99936        | 300.99789          | 4.872     | C <sub>14</sub> H <sub>6</sub> O <sub>8</sub>                | Ellagic acid                       | Organic acid |
| 19* | 18.84    | [M-H] <sup>-</sup> | 609.14716        | 609.14501          | 3.529     | C <sub>27</sub> H <sub>30</sub> O <sub>16</sub>              | Rutin                              | Flavonoid    |
| 20* | 20.25    | [M-H] <sup>-</sup> | 447.09375        | 447.09219          | 3.495     | C <sub>21</sub> H <sub>20</sub> O <sub>11</sub>              | Quercitrin                         | Flavonoid    |
| 21* | 21.11    | [M-H] <sup>-</sup> | 447.09384        | 447.09219          | 3.696     | C <sub>21</sub> H <sub>20</sub> O <sub>11</sub>              | Astragaline                        | Flavonoid    |
| 22  | 21.29    | [M-H] <sup>-</sup> | 593.15216        | 593.15010          | 3.480     | C <sub>27</sub> H <sub>30</sub> O <sub>15</sub>              | Kaempferol-3- <i>O</i> -rutinoside | Flavonoid    |
| 23* | 23.85    | [M-H] <sup>-</sup> | 301.03561        | 301.03428          | 4.422     | C <sub>15</sub> H <sub>10</sub> O <sub>7</sub>               | Quercetin                          | Flavonoid    |
| 24* | 27.04    | [M-H] <sup>-</sup> | 285.04068        | 285.03936          | 4.616     | C <sub>15</sub> H <sub>10</sub> O <sub>6</sub>               | Kaempferol                         | Flavonoid    |

\* means validated by the standard reference compounds.

53

**Table S4** Docking results of the major ingredients in Pu-erh tea extract by Autodocktools.

| <b>Compounds</b> | <b>Affinity (kcal/mol)</b> | <b>Amino acid residues</b>                   |
|------------------|----------------------------|----------------------------------------------|
| EGCG             | -8.2                       | K5, Y38, M40, Y68, K144, N170,<br>P174, E199 |
| GCG              | -8.1                       | M40, W143, K144, D145, N170, P174            |
| ECG              | -8.2                       | E6, Y68, K144, N170, P174                    |
| CG               | -8.2                       | K5, E6, Y38, Y68, K144, P174                 |

54

55

56

57

58

59

60

61

62

63

64

65

66

67

68

69

70

71

72

73

74

75

76

77

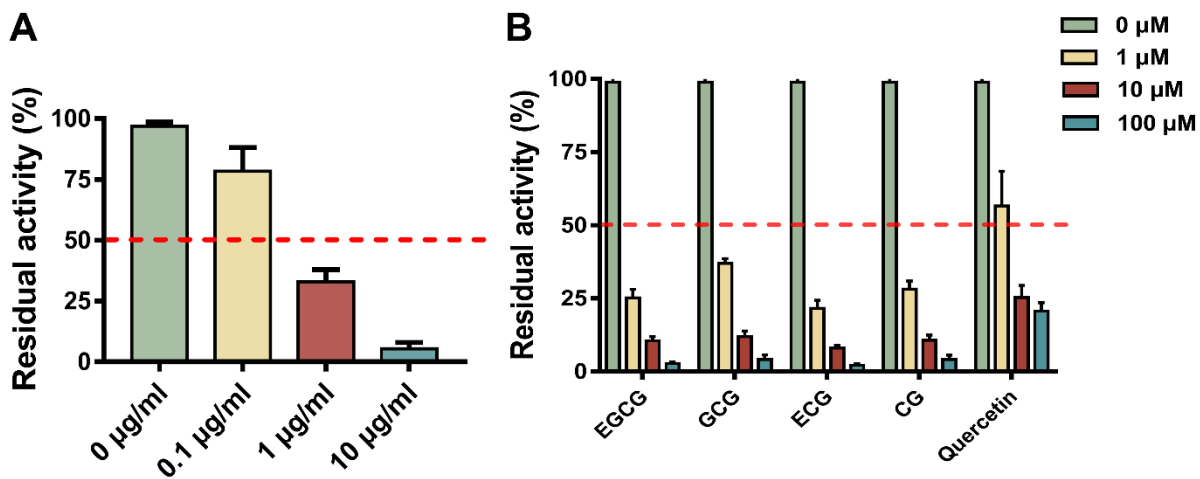

78

79 **Fig. S1.** (A) Anti-COMT effects of Pu-erh tea extract at different concentrations. (B) Anti-COMT  
80 activity of main active constituents in Pu-erh tea extract at different concentrations.

81

82

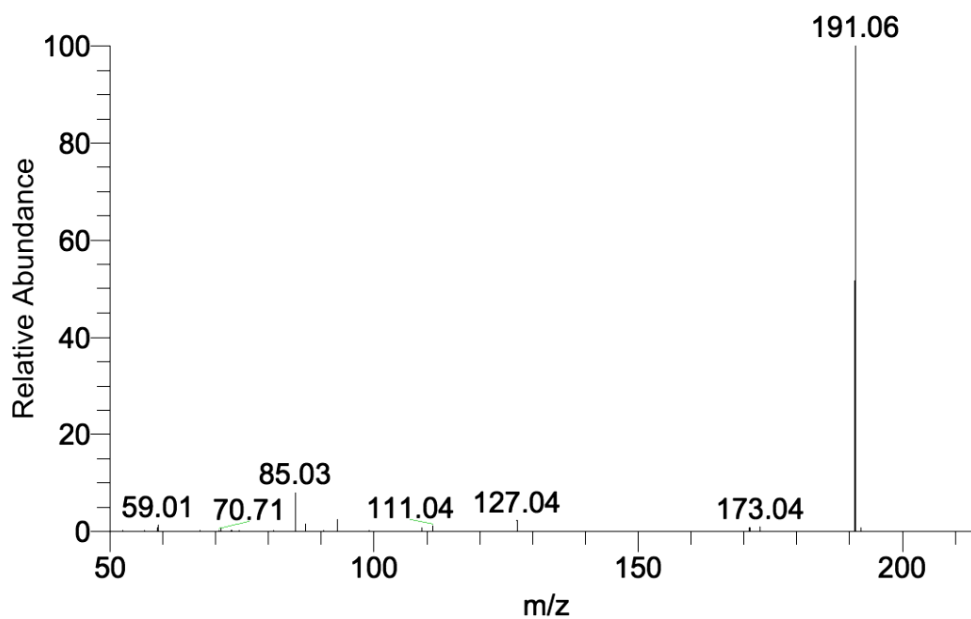

83

84

**Fig. S2.** MS<sup>2</sup> spectrum of quinic acid.

85



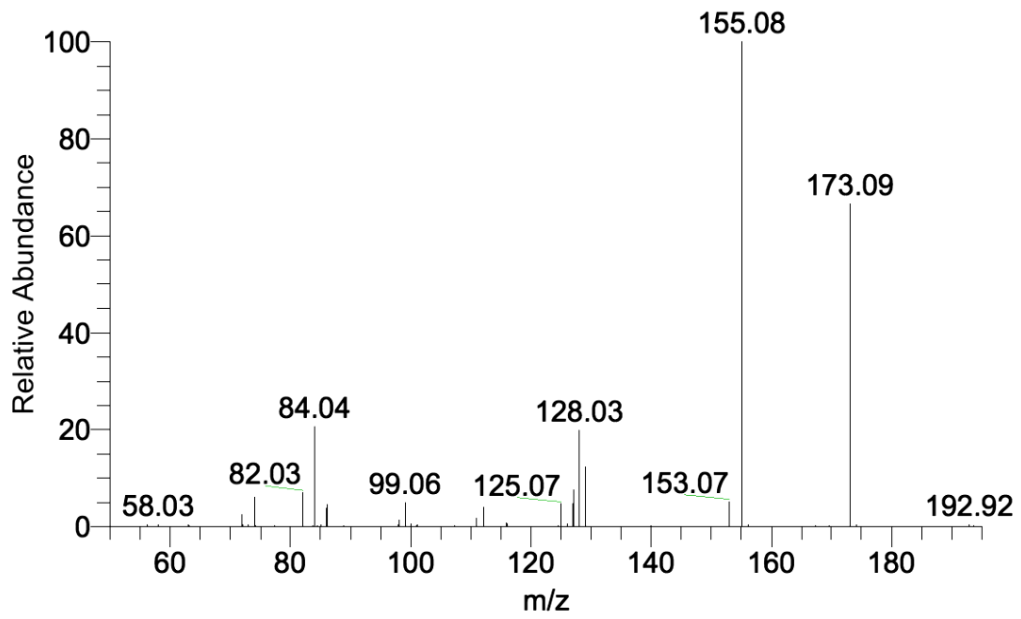

Fig. S3. MS<sup>2</sup> spectrum of theanine.

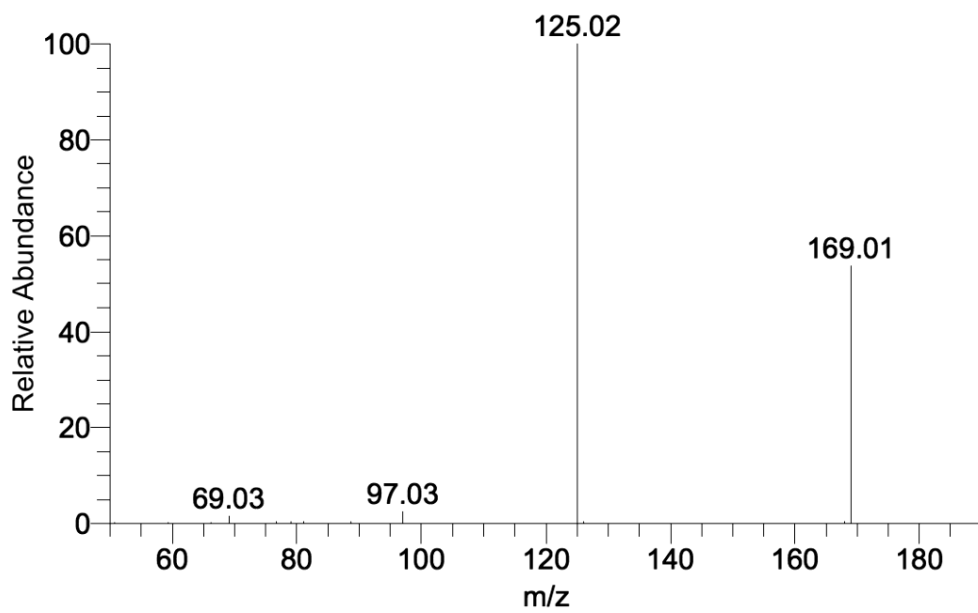

Fig. S4. MS<sup>2</sup> spectrum of gallic acid.

86  
87  
88  
89

90  
91  
92

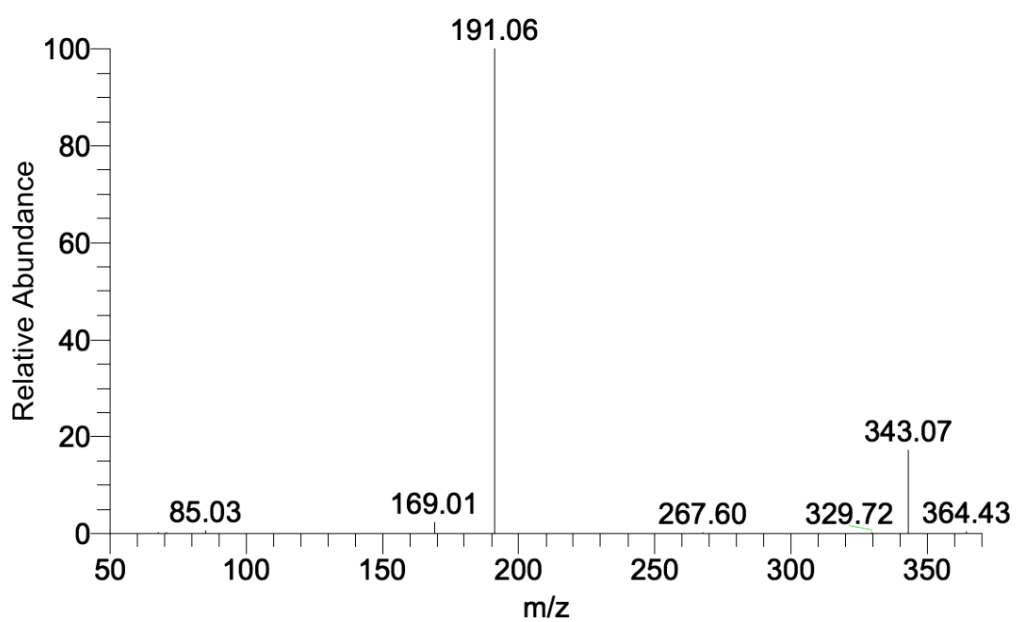

Fig. S5. MS<sup>2</sup> spectrum of theogallin.

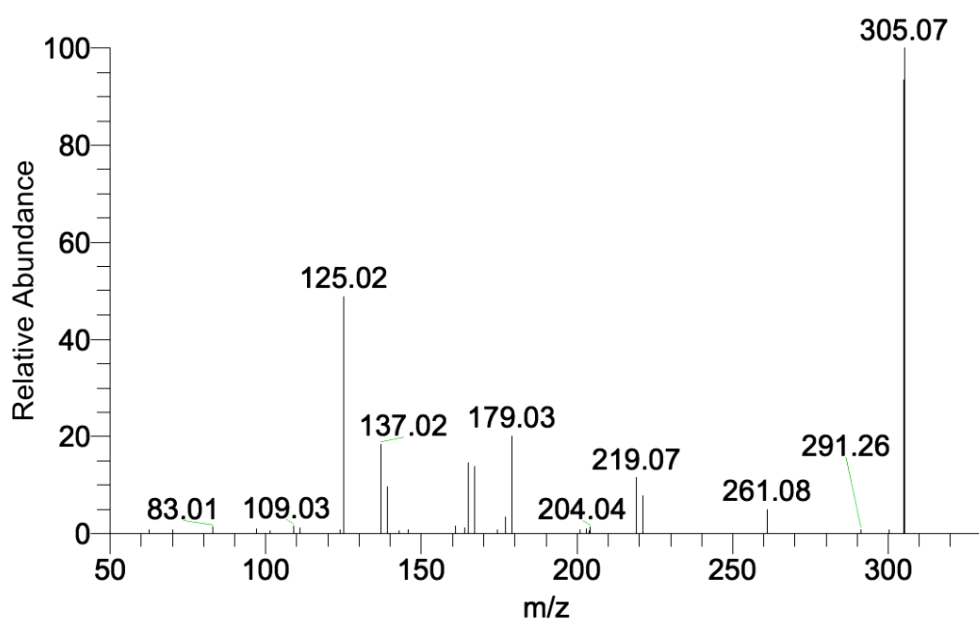

Fig. S6. MS<sup>2</sup> spectrum of galocatechin.

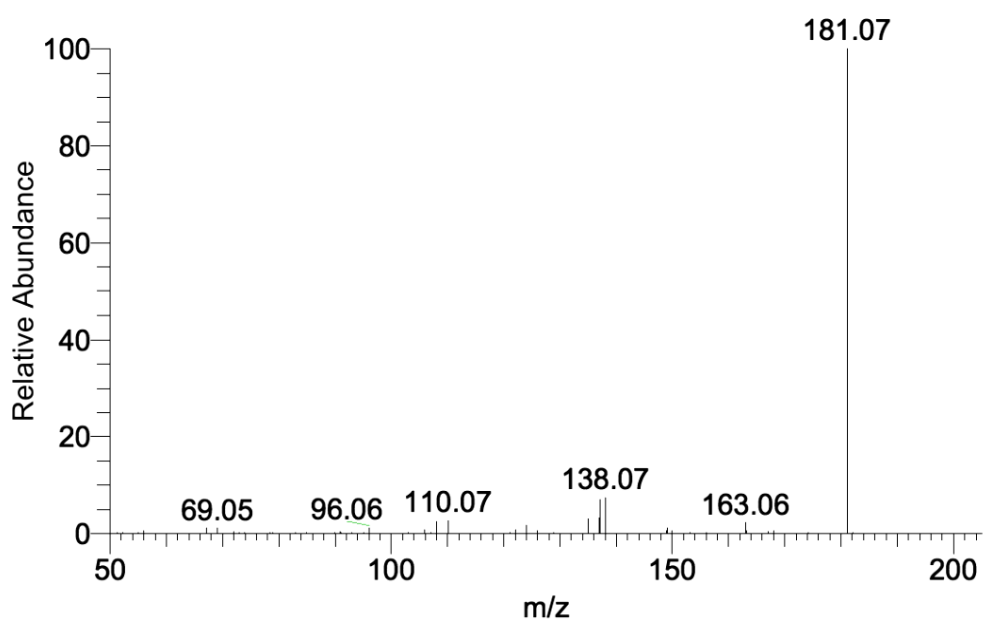

Fig. S7. MS<sup>2</sup> spectrum of theobromine.

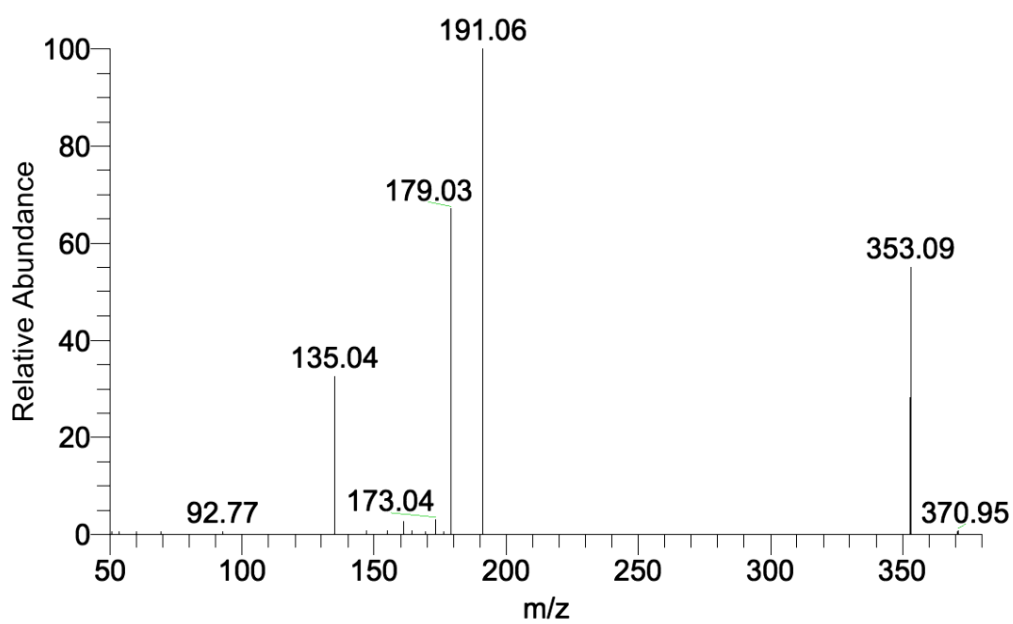

Fig. S8. MS<sup>2</sup> spectrum of neochlorogenic acid.

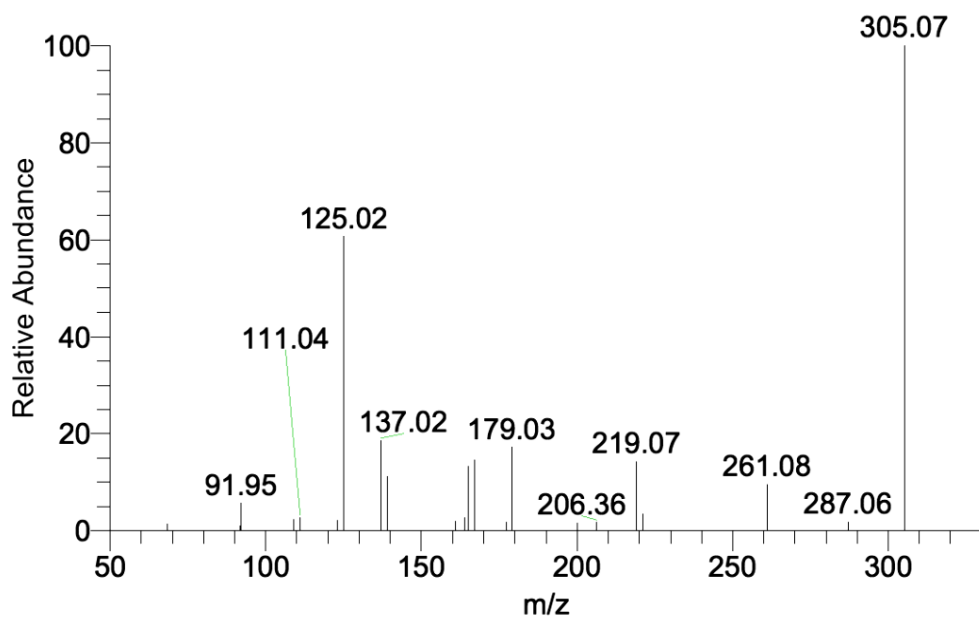

Fig. S9. MS<sup>2</sup> spectrum of epigallocatechin.

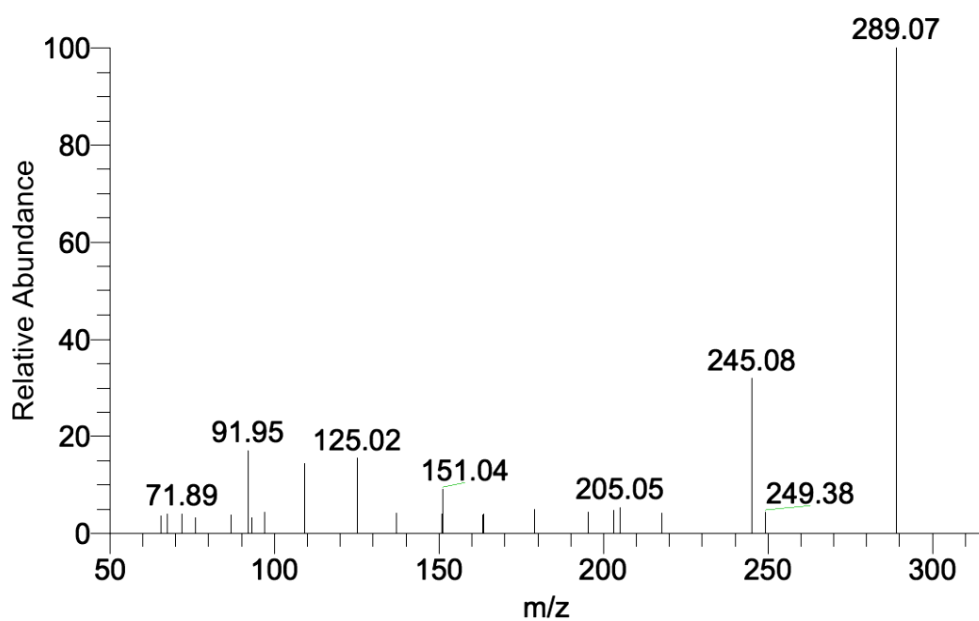

Fig. S10. MS<sup>2</sup> spectrum of catechin.

107  
108  
109  
110

111  
112  
113

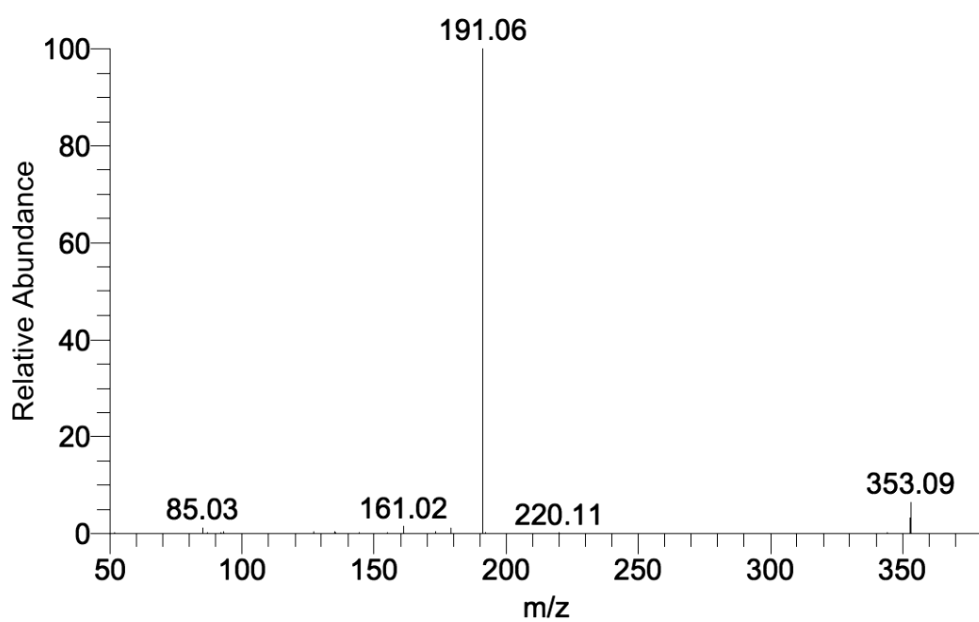

Fig. S11. MS<sup>2</sup> spectrum of chlorogenic acid.

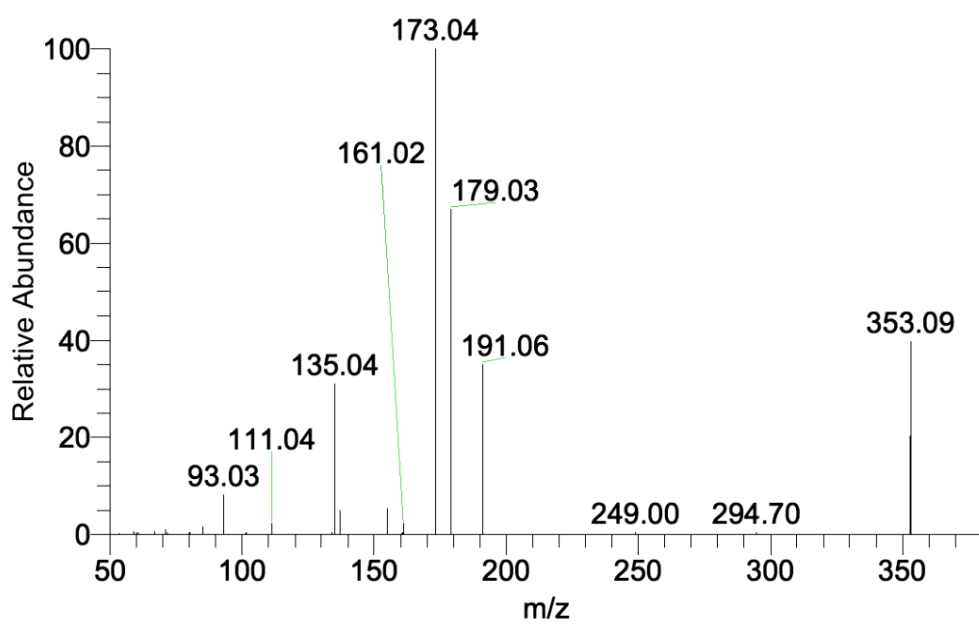

Fig. S12. MS<sup>2</sup> spectrum of cryptochlorogenic acid.

114  
115  
116  
117

118  
119  
120

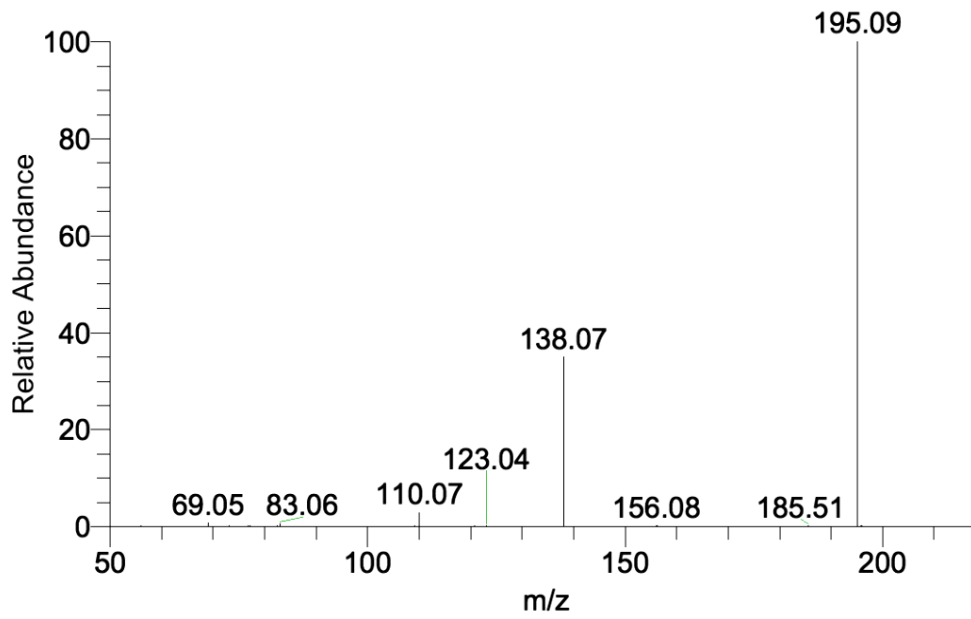

Fig. S13. MS<sup>2</sup> spectrum of caffeine.

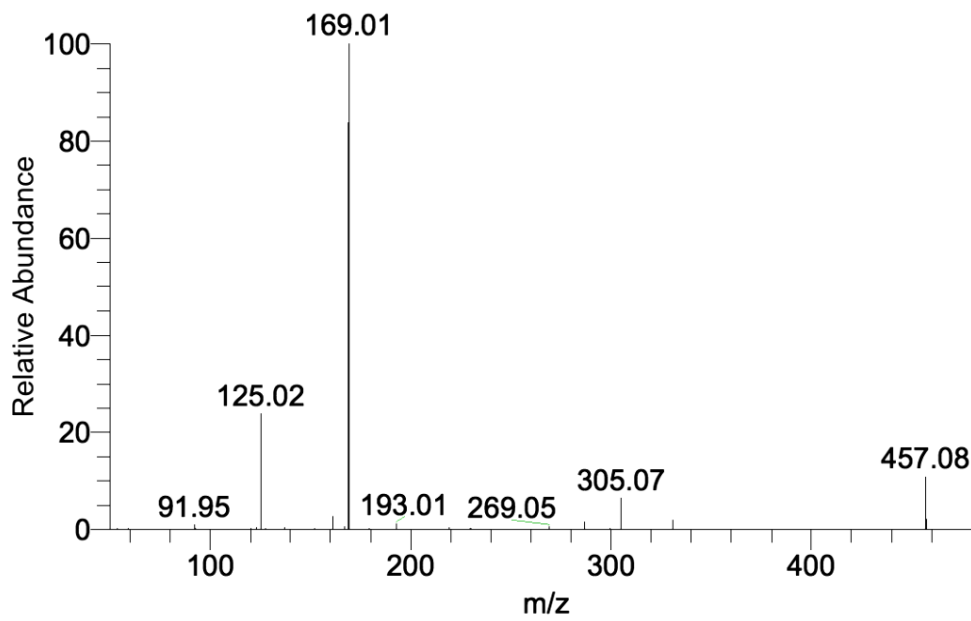

Fig. S14. MS<sup>2</sup> spectrum of gallic acid.

121  
122  
123  
124

125  
126  
127

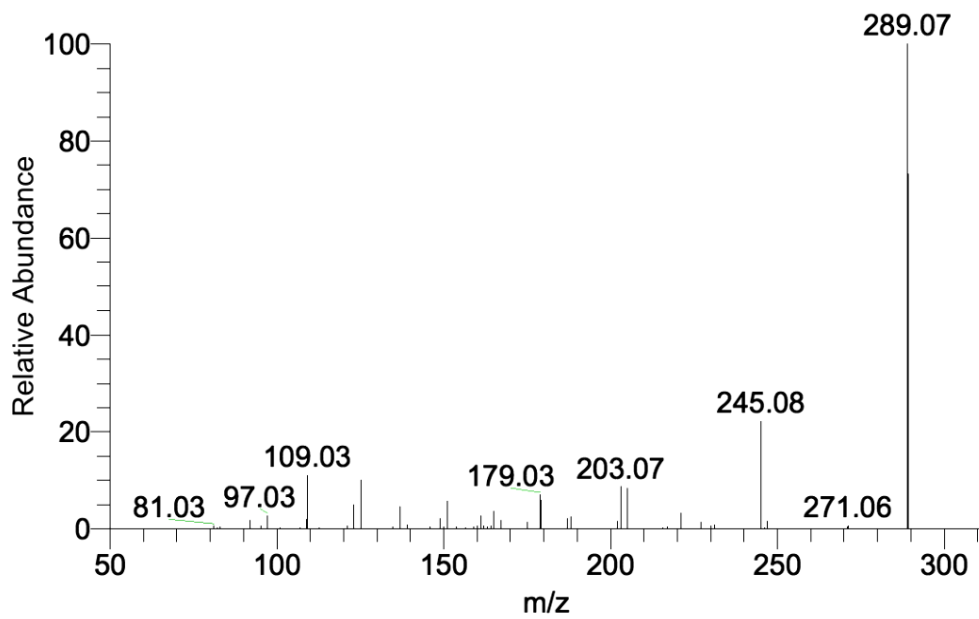

Fig. S15. MS<sup>2</sup> spectrum of epicatechin.

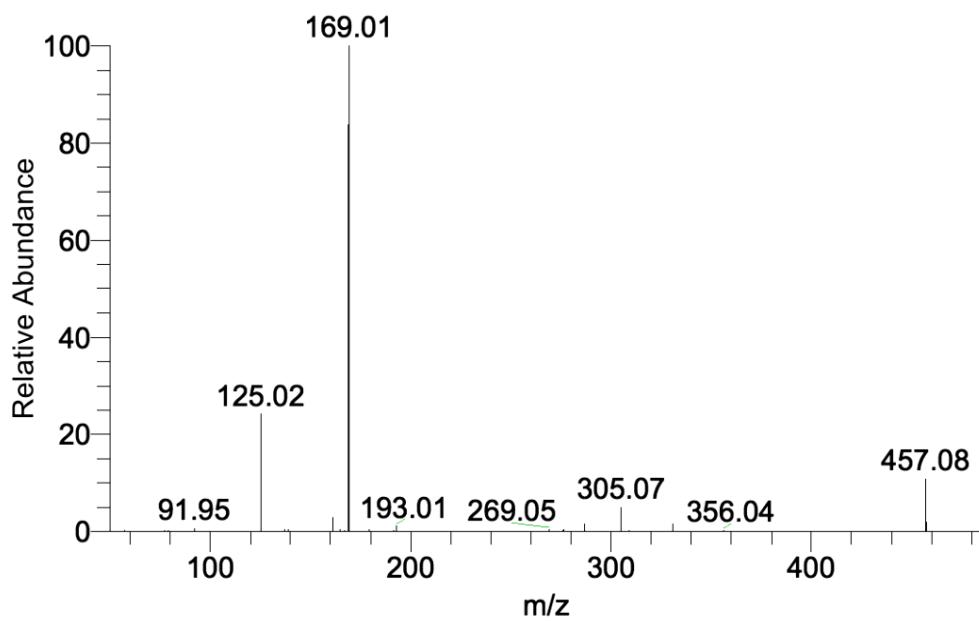

Fig. S16. MS<sup>2</sup> spectrum of epigallocatechin gallate.

128  
129  
130  
131

132  
133  
134

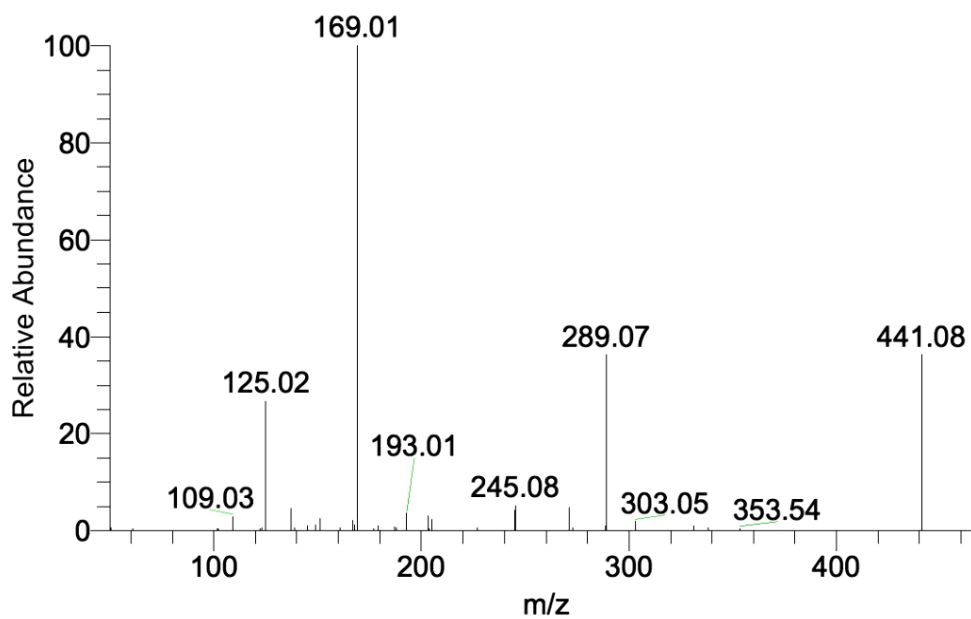

Fig. S17. MS<sup>2</sup> spectrum of catechin gallate.

135  
136  
137  
138

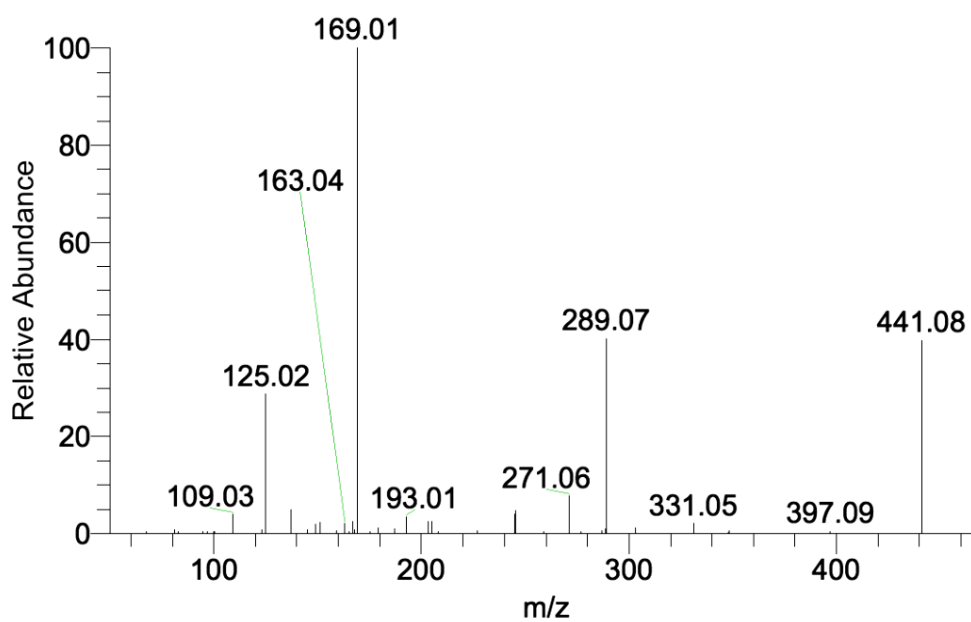

Fig. S18. MS<sup>2</sup> spectrum of epicatechin gallate.

139  
140  
141



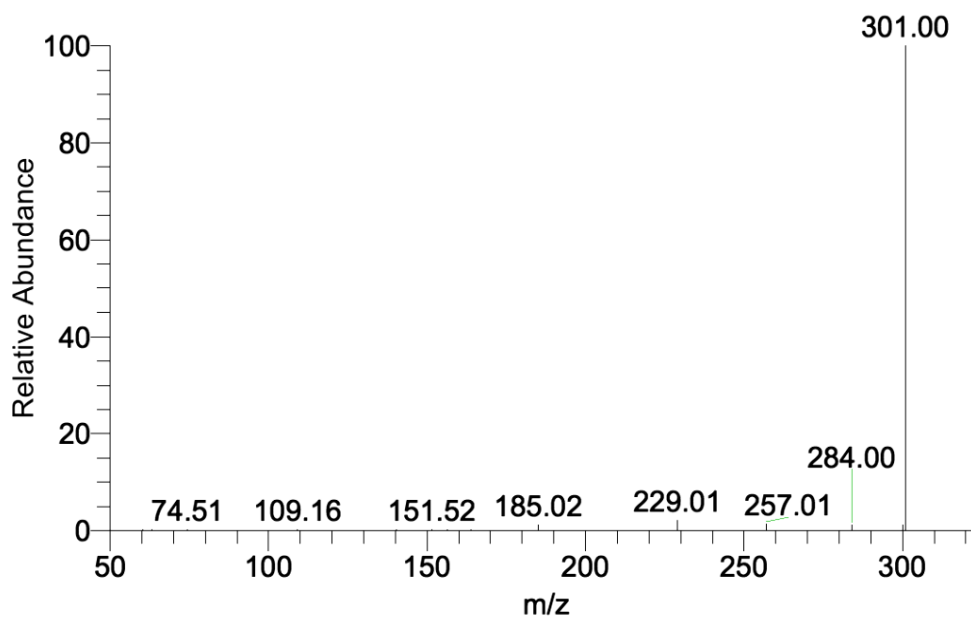

Fig. S19. MS<sup>2</sup> spectrum of ellagic acid.

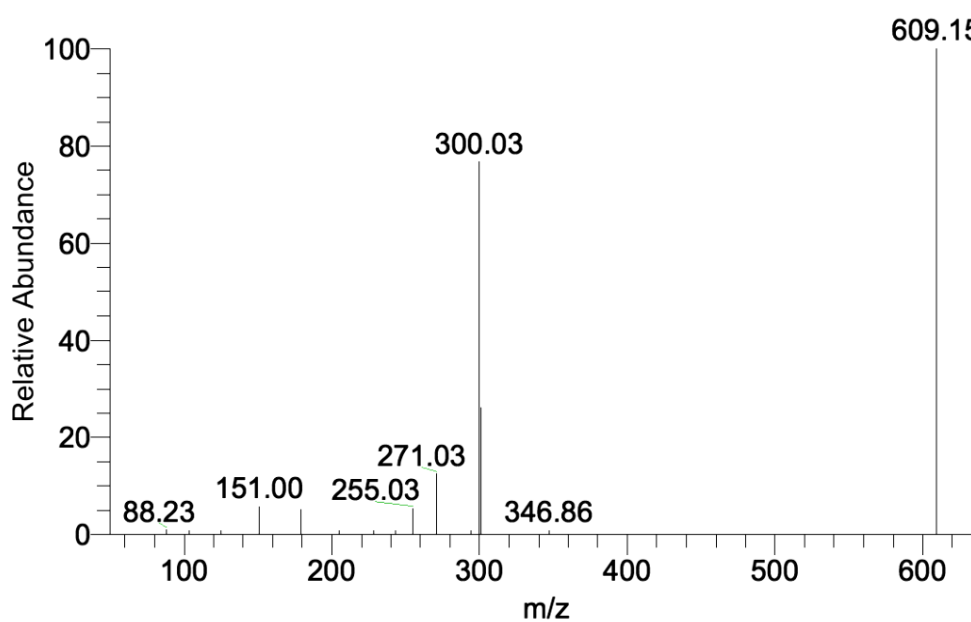

Fig. S20. MS<sup>2</sup> spectrum of rutin.

142  
143  
144  
145

146  
147  
148

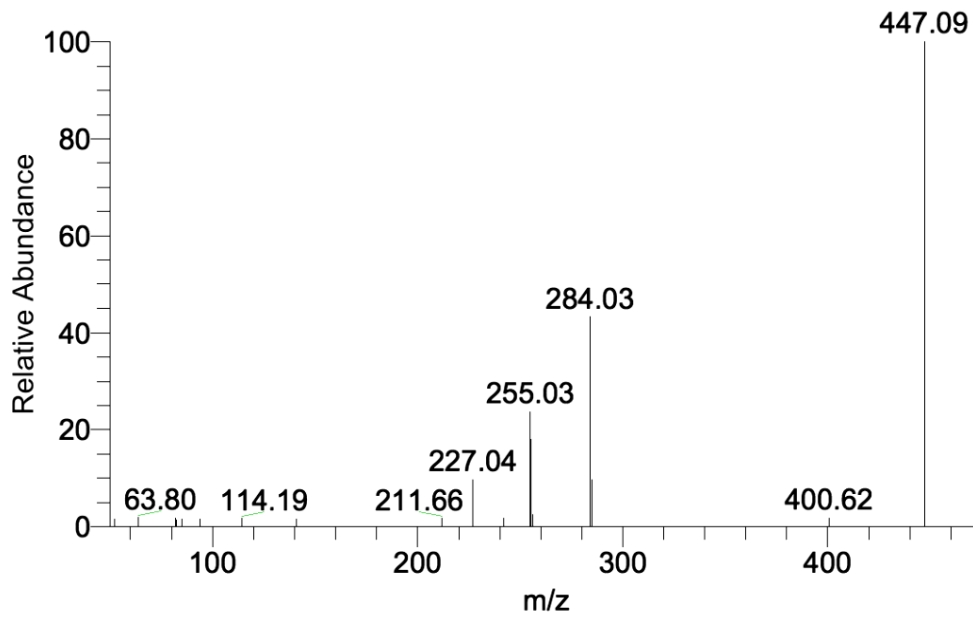

Fig. S21. MS<sup>2</sup> spectrum of quercitrin.

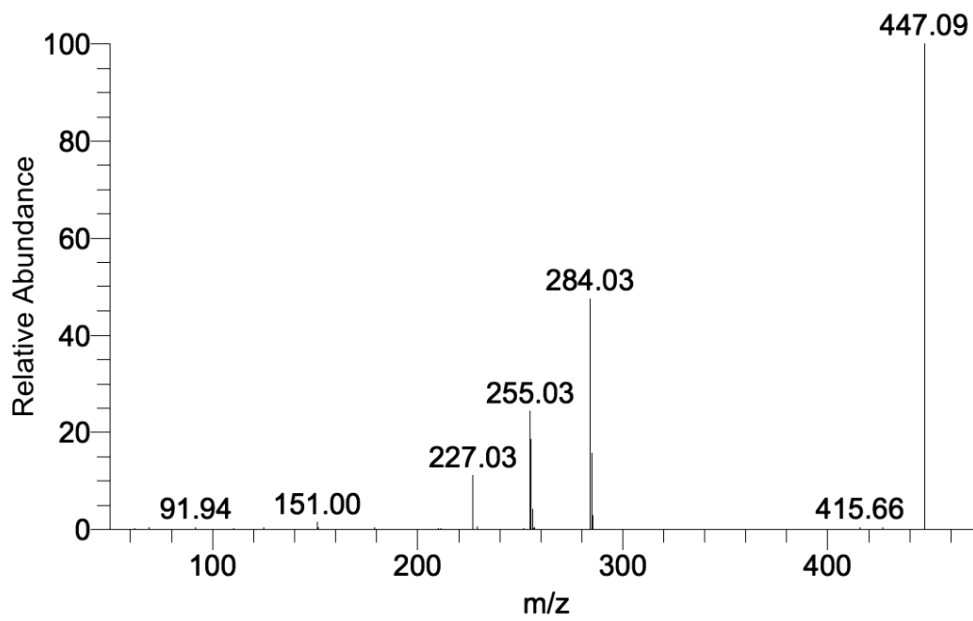

Fig. S22. MS<sup>2</sup> spectrum of astragaline.

149  
150  
151  
152

153  
154  
155

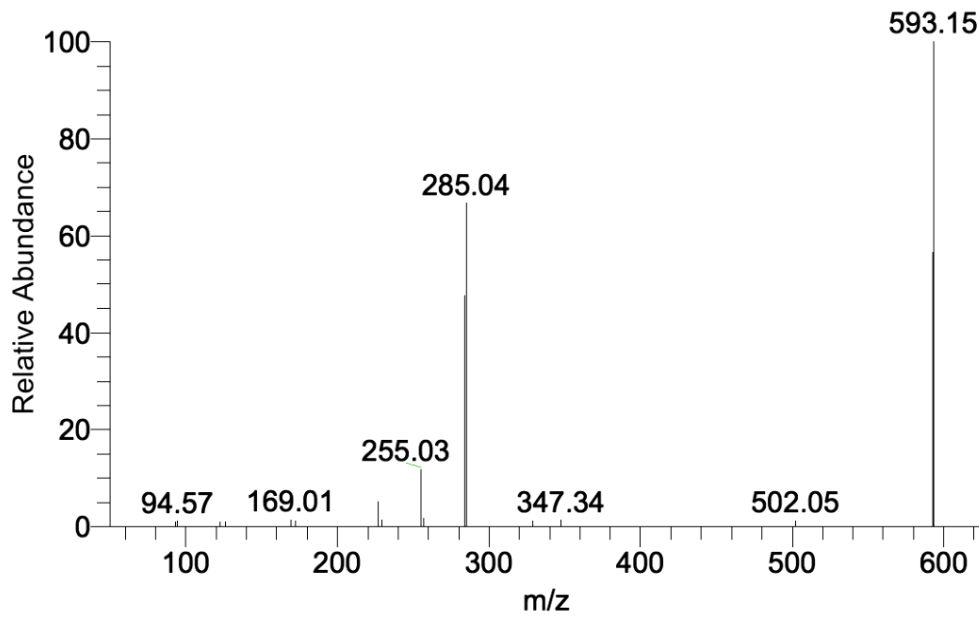

156  
157  
158  
159  
**Fig. S23.** MS<sup>2</sup> spectrum of kaempferol-3-*O*-rutinoside.

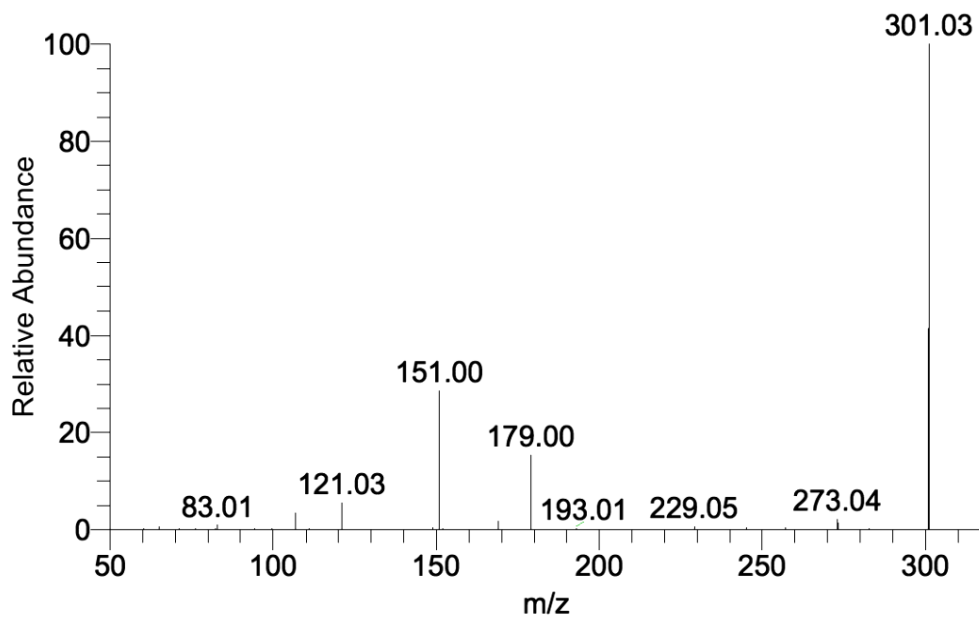

160  
161  
162  
**Fig. S24.** MS<sup>2</sup> spectrum of quercetin.

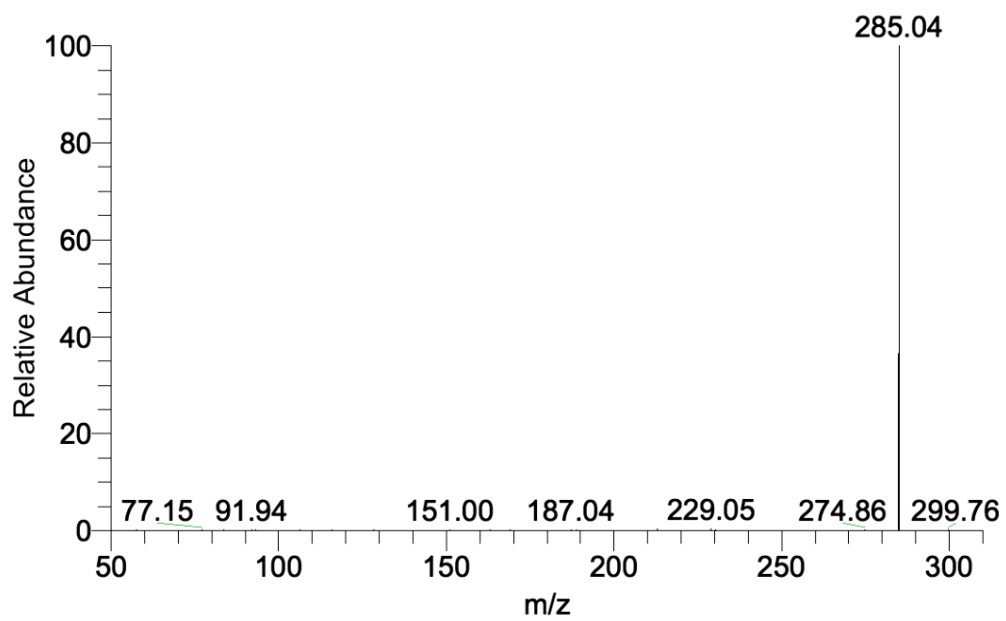

**Fig. S25.** MS<sup>2</sup> spectrum of kaempferol.

163  
164  
165  
166  
167

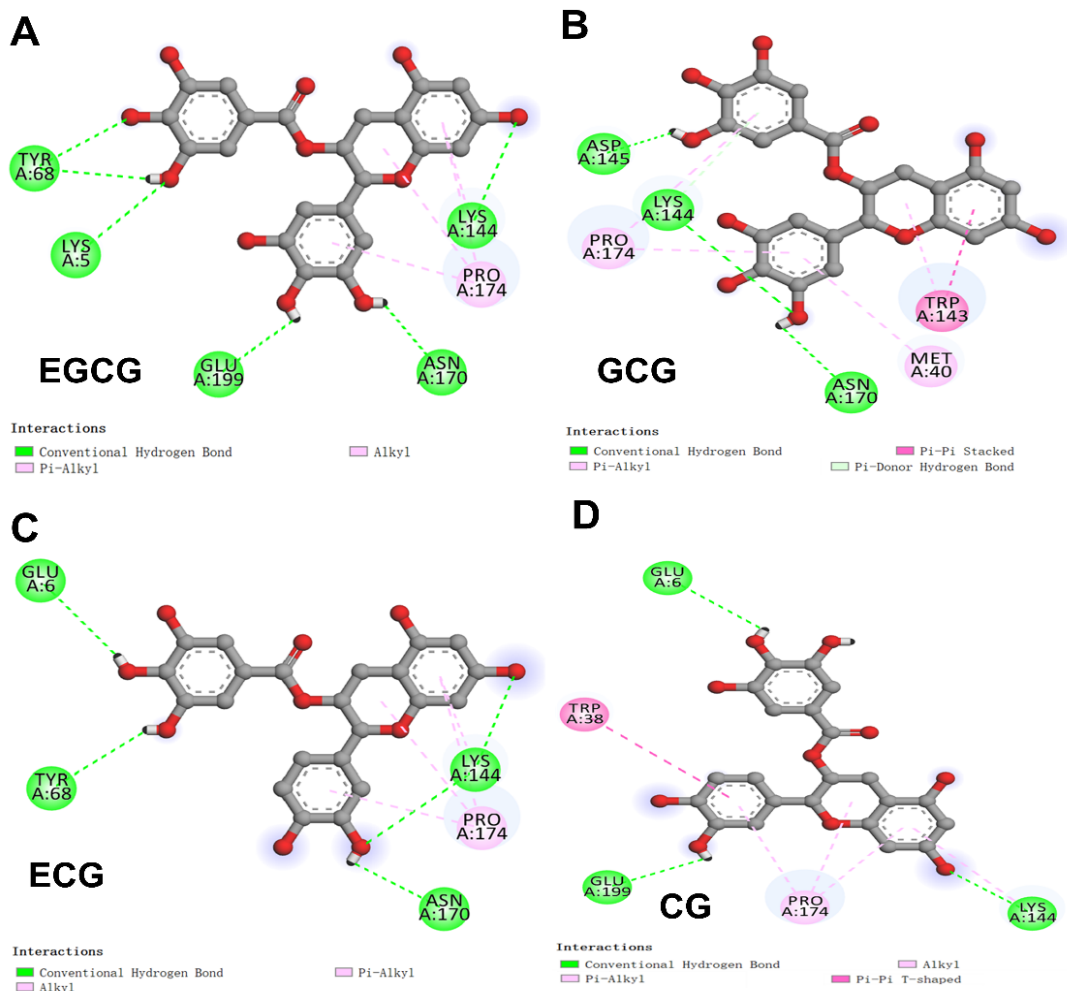

168

169 **Fig. S26.** Interactions between EGCG, GCG, ECG, and CG with residues surrounding the catalytic  
 170 pocket of the COMT substrate.

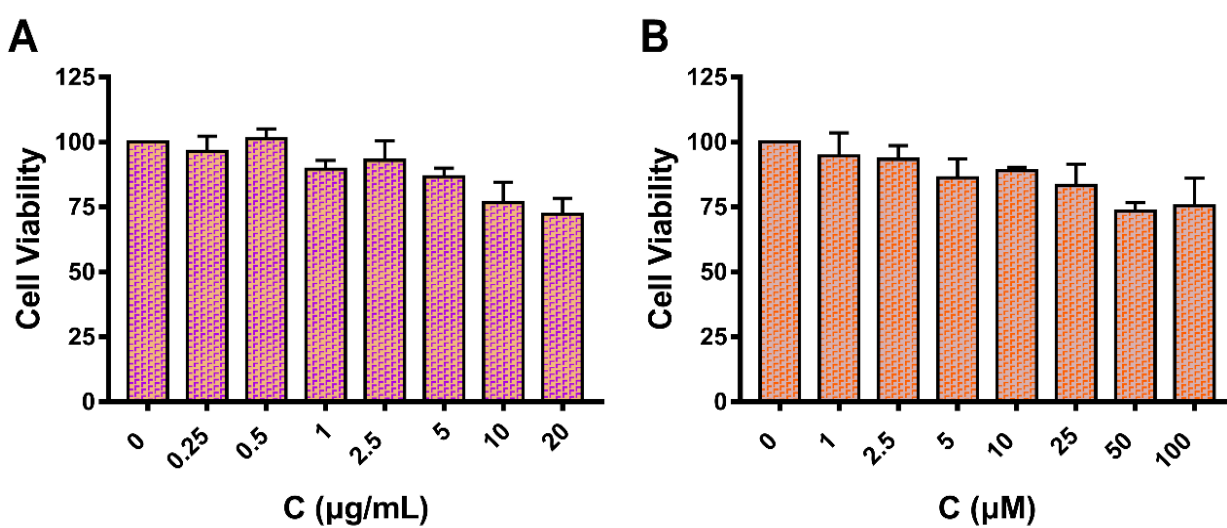

171

172 **Fig. S27.** The cytotoxicity of Pu-erh tea extract (A) and mixture of EGCG, GCG, ECG, and CG (B).
